# Supplementary material
Source: PubMed Central journal article supplement (PMC7333981)
Supplement: mmc1.pdf [file mmc1.pdf]

# THE LANCET

## Global Health

### Supplementary appendix

This appendix formed part of the original submission. We post it as supplied by the authors.

Supplement to: Starr N, Rebollo D, Asemu YM, et al. Pulse oximetry in low-resource settings during the COVID-19 pandemic. *Lancet Glob Health* 2020; published online July 3. [http://dx.doi.org/10.1016/S2214-109X\(20\)30287-4](http://dx.doi.org/10.1016/S2214-109X(20)30287-4).

|                                             | Operating room | Post-anaesthesia care unit | Intensive care unit | Emergency room |
|---------------------------------------------|----------------|----------------------------|---------------------|----------------|
| Hospitals with functioning unit (n=59)      | 59 (100%)      | 48 (83%)                   | 41 (70%)            | 54* (91%)      |
| Functioning beds                            | 3 (2-6)        | 4 (2-8)                    | 4 (0-6)             | 4 (2-6)        |
| Integrated pulse oximeters                  | 3 (2-5)        | 2 (1-4)                    | 4 (4-6)             | 1 (0-2)        |
| Portable pulse oximeters                    | 0 (0-2)        | 0 (0-1)                    | 0 (0-1)             | 0 (0-1)        |
| Monitoring gap†                             | -0.6 (2.3)     | 2.9 (3.1)                  | 1.2 (2.7)           | 2.9 (3.1)      |
| Units with complete pulse oximetry coverage | 52/59 (88%)    | 8/48 (17%)                 | 23/41 (56%)         | 13/53 (25%)    |

Data are n (%), median (IQR), mean (SD), or n/N (%). \*Number of integrated or portable monitors was not available for one of the surveyed emergency rooms—53 functioning emergency rooms were used for the monitoring gap calculations. †Monitoring gap=functional beds-(integrated pulse oximeters+portable pulse oximeters).

**Table: Pulse oximetry monitoring capacity and gaps by clinical care unit**
